# Supplementary material for: Iron deficient erythropoiesis might play key role in development of anemia in cancer patients
Source: PubMed Central journal article supplement (PMC4767472; doi:10.18632/oncotarget.5658), 2015-10-26
Supplement: oncotarget-06-42803-s001.pdf [file oncotarget-06-42803-s001.pdf]

## SUPPLEMENTARY TABLES

Supplementary Table S1: Baseline characteristics of patients from 1<sup>st</sup> data set

| Patients' characteristics                 |                                       | Number (%)      |             |
|-------------------------------------------|---------------------------------------|-----------------|-------------|
| Age, years                                | Median (range)                        | 59 (26–84)      |             |
| Gender                                    | Male                                  | 216 (62.6%)     |             |
|                                           | Female                                | 129 (37.4%)     |             |
| Baseline laboratory findings at diagnosis | Hemoglobin (g/dL)                     | 13.18 ± 1.95    |             |
|                                           | MCV (fL)                              | 89.67 ± 6.81    |             |
|                                           | Hemoglobin ≤11 g/dL, number (%)       | 49 (14.2%)      |             |
| Disease                                   | Gastric cancer                        | 101 (29.3%)     |             |
|                                           | Colorectal cancer                     | 69 (20.0%)      |             |
|                                           | Hepatocellular carcinoma              | 23 (6.7%)       |             |
|                                           | Lung cancer                           | 152 (44.1%)     |             |
| First line treatment                      | Treatment modality other than surgery | Chemotherapy    | 215 (62.3%) |
|                                           |                                       | Chemo-radiation | 75 (21.7%)  |
|                                           |                                       | Target agents   | 55 (15.9%)  |
| Purpose of the treatment                  | Purpose of the treatment              | Neoadjuvant     | 6 (1.7%)    |
|                                           |                                       | Adjuvant        | 170 (49.3%) |
|                                           |                                       | Definitive      | 15 (4.3%)   |
|                                           |                                       | Palliative      | 154 (44.6%) |

**Supplementary Table S2: Baseline characteristics of patients from 2<sup>nd</sup> data set**

| Patients' characteristics    |                      | Number (%)     |
|------------------------------|----------------------|----------------|
| Age, years                   | Median (IQR, range)  | 58 (15, 27–82) |
| Gender                       | Male                 | 27 (69.2%)     |
|                              | Female               | 12 (30.8%)     |
| Disease                      | Gastric cancer       | 11 (28.2%)     |
|                              | Biliary tract cancer | 6 (15.4%)      |
|                              | Lung cancer          | 18 (46.2%)     |
|                              | Lymphoma             | 4 (10.3%)      |
| Metastasis**                 | Yes                  | 31 (88.6%)     |
|                              | No                   | 4 (11.4%)      |
| Chemotherapy within 6 months | Yes                  | 26 (66.7%)     |
|                              | No                   | 13 (33.3%)     |
| Hemoglobin (g/dL)            | Median (IQR)         | 9.5 (6.2)      |
| MCV (fL)                     | Mean± SD             | 92.2 ± 1.3     |

Abbreviates: MCV, mean corpuscular volume; SD, standard deviation; IQR, interquartile range

\*\*Lymphoma patients ( $n = 4$ ) were excluded from the analysis

**Supplementary Table S3: Biochemical parameters in cancer patients**

|                 |        |       |                 | General population | Population in this study   |
|-----------------|--------|-------|-----------------|--------------------|----------------------------|
| Ferritin, ng/mL | Women  | Mean  | Premenopausal   | 53                 | 224.7 ± 78.3*              |
|                 |        |       | Post-menopausal | 105                |                            |
|                 |        | Range | Premenopausal   | 6–180              | 7.5–930.9                  |
|                 |        |       | Post-menopausal | 8–350              |                            |
|                 | Men    | Mean  |                 | 175                | 240.7 ± 36.1*              |
|                 |        | Range |                 | 20–400             | 2.1–611.9                  |
| sTfR, ug/mL     | Mean   |       |                 | 0.854              | 1.03 ± 0.09                |
|                 | Range  |       |                 | 0.072–1.699        | 0.36–2.63                  |
| CRP, mg/L       | Mean   |       |                 | –                  | 14.73 ± 4.10               |
|                 | Median |       |                 | –                  | 3.42 (13.95**)             |
|                 | Range  |       |                 | 0.068–8.2          | 0.01–100.00                |
| Hepcidin, ng/mL | Mean   |       |                 | 10.1               | 12.50 ± 1.78*              |
|                 | Median |       |                 | 7.2                | 9.52 (16.18**, 1.19–50.33) |

\*Standard deviation (SD)

\*\*Interquartile range (IQR)

**Supplementary Table S4: Correlation between conventional iron parameters and cancer anemia related parameters**

4-1

|                        |                 |                                   | No anemia ( <i>n</i> = 18) | Anemia ( <i>n</i> = 21) | <i>p</i> -value |
|------------------------|-----------------|-----------------------------------|----------------------------|-------------------------|-----------------|
| Biochemical parameters | Ferritin, ng/mL | Median (IQR)                      | 166.7 ± 29.7               | 295.0 ± 55.5            | <b>0.050</b>    |
|                        | Iron            | 67.31+/-8.39<br>55.00 (74, 9-156) | 89.5 (59, 37-139)          | 37 (62, 9-156)          | <b>0.024</b>    |
|                        | TIBC            | 275.0 (136, 164-435)              | 322.5 (114, 225-386)       | 266 (184, 164-435)      | 0.352           |
|                        | TS              | 25.30 (20.2, 2.8-43.7)            | 29.6 (12.8, 15.6-40.6)     | 14.3 (24.7, 2.8-43.7)   | 0.069           |

4-2

|                              |      | Ferritin |                  | sTfR     |                 | CRP      |                 | Hepcidin |                  | Hemoglobin |                 |
|------------------------------|------|----------|------------------|----------|-----------------|----------|-----------------|----------|------------------|------------|-----------------|
|                              |      | <i>r</i> | <i>p</i> -value  | <i>r</i> | <i>p</i> -value | <i>r</i> | <i>p</i> -value | <i>r</i> | <i>p</i> -value  | <i>r</i>   | <i>p</i> -value |
| Conventional iron parameters | Iron | -        | 0.951            | -        | 0.063           | -0.559   | <b>0.002</b>    | -        | 0.822            | 0.437      | <b>0.018</b>    |
|                              | TIBC | -0.698   | <b>&lt;0.000</b> | -        | 0.289           | -0.497   | <b>0.006</b>    | -0.654   | <b>&lt;0.001</b> | -          | 0.696           |
|                              | TS   | -        | 0.179            | -        | 0.187           | -0.441   | <b>0.017</b>    | -        | 0.189            | 0.400      | <b>0.031</b>    |
